# Supplementary material
Source: PubMed Central journal article supplement (PMC7966122)
Supplement: 2105_tables.pdf [file 2105_tables.pdf]

**On-line Table 1: MD and FA values of WM tracts in healthy controls and patients with ALS<sup>a</sup>**

| WM Tract                  | Side  | DTI Variable | Healthy Controls | Patients with ALS | P Value <sup>b</sup> |
|---------------------------|-------|--------------|------------------|-------------------|----------------------|
| CST                       | Right | MD           | 0.75 (0.02)      | 0.78 (0.03)       | .02 <sup>c</sup>     |
|                           |       | FA           | 0.57 (0.02)      | 0.55 (0.02)       | .03 <sup>c</sup>     |
|                           | Left  | MD           | 0.75 (0.02)      | 0.78 (0.03)       | .02 <sup>c</sup>     |
|                           |       | FA           | 0.58 (0.02)      | 0.56 (0.03)       | .03 <sup>c</sup>     |
| Corpus callosum           |       | MD           | 0.82 (0.03)      | 0.85 (0.05)       | .11                  |
|                           |       | FA           | 0.64 (0.02)      | 0.63 (0.03)       | .62                  |
| Uncinate fasciculus       | Right | MD           | 0.80 (0.03)      | 0.81 (0.04)       | .18                  |
|                           |       | FA           | 0.48 (0.03)      | 0.48 (0.03)       | .33                  |
|                           | Left  | MD           | 0.82 (0.03)      | 0.84 (0.05)       | .28                  |
|                           |       | FA           | 0.44 (0.02)      | 0.44 (0.03)       | .52                  |
| Cingulum                  | Right | MD           | 0.78 (0.03)      | 0.78 (0.04)       | .83                  |
|                           |       | FA           | 0.41 (0.03)      | 0.41 (0.02)       | .51                  |
|                           | Left  | MD           | 0.79 (0.03)      | 0.78 (0.04)       | .30                  |
|                           |       | FA           | 0.42 (0.02)      | 0.42 (0.03)       | .72                  |
| Superior longitudinal     | Right | MD           | 0.78 (0.03)      | 0.79 (0.04)       | .67                  |
|                           |       | FA           | 0.48 (0.04)      | 0.49 (0.03)       | .05                  |
|                           | Left  | MD           | 0.78 (0.03)      | 0.77 (0.04)       | .36                  |
|                           |       | FA           | 0.47 (0.03)      | 0.48 (0.02)       | .16                  |
| Inferior longitudinal     | Right | MD           | 0.83 (0.03)      | 0.84 (0.04)       | .38                  |
|                           |       | FA           | 0.47 (0.02)      | 0.46 (0.02)       | .53                  |
|                           | Left  | MD           | 0.83 (0.03)      | 0.84 (0.03)       | .65                  |
|                           |       | FA           | 0.48 (0.02)      | 0.48 (0.02)       | .62                  |
| Inferior fronto-occipital | Right | MD           | 0.80 (0.03)      | 0.81 (0.03)       | .52                  |
|                           |       | FA           | 0.53 (0.03)      | 0.53 (0.03)       | .91                  |
|                           | Left  | MD           | 0.80 (0.03)      | 0.81 (0.04)       | .96                  |
|                           |       | FA           | 0.53 (0.02)      | 0.53 (0.03)       | .32                  |

<sup>a</sup> Values are mean (± SD). MD is [ $\times 10^{-3}$  mm<sup>2</sup> s<sup>-1</sup>].

<sup>b</sup> Univariate analysis of variance, adjusted for the subject's age.

<sup>c</sup> Significant.

**On-line Table 2: Radial and axial diffusivity values of white matter tracts in healthy controls and patients with ALS<sup>a</sup>**

| WM Tract                  | Side  | DTI Variable | Healthy Controls | Patients with ALS | P Value <sup>b</sup> |
|---------------------------|-------|--------------|------------------|-------------------|----------------------|
| CST                       | Right | Radial D     | 0.48 (0.03)      | 0.50 (0.03)       | .01 <sup>c</sup>     |
|                           |       | Axial D      | 1.31 (0.03)      | 1.32 (0.05)       | .33                  |
|                           | Left  | Radial D     | 0.47 (0.03)      | 0.50 (0.03)       | .01 <sup>c</sup>     |
|                           |       | Axial D      | 1.32 (0.03)      | 1.33 (0.05)       | .60                  |
| Corpus callosum           |       | Radial D     | 0.47 (0.03)      | 0.49 (0.05)       | .19                  |
|                           |       | Axial D      | 1.53 (0.05)      | 1.56 (0.06)       | .15                  |
| Uncinate fasciculus       | Right | Radial D     | 0.57 (0.04)      | 0.58 (0.04)       | .60                  |
|                           |       | Axial D      | 1.26 (0.04)      | 1.29 (0.06)       | .04 <sup>c</sup>     |
|                           | Left  | Radial D     | 0.60 (0.03)      | 0.62 (0.05)       | .59                  |
|                           |       | Axial D      | 1.25 (0.04)      | 1.28 (0.06)       | .11                  |
| Cingulum                  | Right | Radial D     | 0.59 (0.03)      | 0.59 (0.04)       | .72                  |
|                           |       | Axial D      | 1.16 (0.03)      | 1.16 (0.05)       | .98                  |
|                           | Left  | Radial D     | 0.59 (0.03)      | 0.59 (0.04)       | .35                  |
|                           |       | Axial D      | 1.18 (0.03)      | 1.17 (0.05)       | .32                  |
| Superior longitudinal     | Right | Radial D     | 0.55 (0.04)      | 0.55 (0.05)       | .48                  |
|                           |       | Axial D      | 1.23 (0.04)      | 1.26 (0.05)       | .05                  |
|                           | Left  | Radial D     | 0.56 (0.04)      | 0.56 (0.04)       | .24                  |
|                           |       | Axial D      | 1.21 (0.04)      | 1.21 (0.05)       | .87                  |
| Inferior longitudinal     | Right | Radial D     | 0.60 (0.03)      | 0.62 (0.04)       | .27                  |
|                           |       | Axial D      | 1.29 (0.03)      | 1.30 (0.05)       | .77                  |
|                           | Left  | Radial D     | 0.59 (0.03)      | 0.60 (0.03)       | .76                  |
|                           |       | Axial D      | 1.32 (0.03)      | 1.33 (0.05)       | .61                  |
| Inferior fronto-occipital | Right | Radial D     | 0.54 (0.04)      | 0.55 (0.04)       | .76                  |
|                           |       | Axial D      | 1.33 (0.03)      | 1.34 (0.05)       | .43                  |
|                           | Left  | Radial D     | 0.54 (0.03)      | 0.54 (0.04)       | .71                  |
|                           |       | Axial D      | 1.33 (0.04)      | 1.34 (0.05)       | .55                  |

<sup>a</sup> Values are mean (± SD). Radial D and axial D are [ $\times 10^{-3}$  mm<sup>2</sup> s<sup>-1</sup>].

<sup>b</sup> Univariate analysis of variance, adjusted for the subject's age.

<sup>c</sup> Significant.
